# Supplementary material for: Passive Smoking in the Etiology of Non-Syndromic Orofacial Clefts: A Systematic Review and Meta-Analysis
Source: PubMed Central journal article supplement (PMC4356514; doi:10.1371/journal.pone.0116963), 2015-03-11
Supplement: pone.0116963.s002.pdf [file pone.0116963.s002.pdf]

S1\_Search strategy for systematic review assessing the relation between passive smoking and non-syndromic orofacial cleft

**Search engine:**

Scopus, PubMed, Google literature.

Key words listed in table 1

**Inclusion criteria:**

- Case-control studies comparing passive smoking with NSOFC
- Cross sectional or cohort studies relating passive smoking with NSOFC
- Time limitation 1995-2013

**Exclusion criteria:**

- Cross sectional studies or cohort studies that do not include a control group
- Studies discussing other type of smoking and etiological factors.
- Studies that discussed congenital abnormalities as a whole and did not specify non-syndromic OFC cases in the analysis.
- No language exclusion

**Table listing the keywords used in the search with the number of article found in each search engine:**

| Key Words                                                 | No of Articles |
|-----------------------------------------------------------|----------------|
| <i>Scopus</i>                                             |                |
| TITLE-ABS-KEY(cleft lip)                                  | 17,433         |
| TITLE-ABS-KEY-AUTH(cleft palate)                          | 25,229         |
| TITLE-ABS-KEY-AUTH(orofacial cleft)                       | 1,002          |
| TITLE-ABS-KEY-AUTH(tobacco smoke pollution)               | 11,222         |
| TITLE-ABS-KEY-AUTH(passive smoking)                       | 9,335          |
| TITLE-ABS-KEY-AUTH(second hand smoking)                   | 1,401          |
| TITLE-ABS-KEY-AUTH(environmental tobacco smoke pollution) | 5,394          |
| TITLE-ABS-KEY(cleft PRE/10 lip)                           | 17,008         |
| TITLE-ABS-KEY-AUTH(smoking)                               | 270,416        |

|                                                                                                                                                                                                                                                                                                                                                                                                                                                                                                                                                                                                                                                                                                                                                                                                                                                                                                                                                                                                                                                                                                      |            |
|------------------------------------------------------------------------------------------------------------------------------------------------------------------------------------------------------------------------------------------------------------------------------------------------------------------------------------------------------------------------------------------------------------------------------------------------------------------------------------------------------------------------------------------------------------------------------------------------------------------------------------------------------------------------------------------------------------------------------------------------------------------------------------------------------------------------------------------------------------------------------------------------------------------------------------------------------------------------------------------------------------------------------------------------------------------------------------------------------|------------|
| (TITLE-ABS-KEY(cleft lip)) OR (TITLE-ABS-KEY-AUTH(cleft palate)) OR (TITLE-ABS-KEY-AUTH(orofacial cleft))                                                                                                                                                                                                                                                                                                                                                                                                                                                                                                                                                                                                                                                                                                                                                                                                                                                                                                                                                                                            | 28,473     |
| TITLE-ABS-KEY-AUTH(passive smoking)) OR (TITLE-ABS-KEY-AUTH(tobacco smoke pollution)) OR (TITLE-ABS-KEY-AUTH(environmental tobacco smoke pollution))                                                                                                                                                                                                                                                                                                                                                                                                                                                                                                                                                                                                                                                                                                                                                                                                                                                                                                                                                 | 15,468     |
| (TITLE-ABS-KEY-AUTH(smoking)) OR (TITLE-ABS-KEY-AUTH(passive smoking)) OR (TITLE-ABS-KEY-AUTH(secondhand smoking)) OR (TITLE-ABS-KEY-AUTH(tobacco smoke pollution)) OR (TITLE-ABS-KEY-AUTH(environmental tobacco smoke pollution))                                                                                                                                                                                                                                                                                                                                                                                                                                                                                                                                                                                                                                                                                                                                                                                                                                                                   | 272,348    |
| ((TITLE-ABS-KEY-AUTH(smoking)) OR (TITLE-ABS-KEY-AUTH(passive smoking)) OR (TITLE-ABS-KEY-AUTH(secondhand smoking)) OR (TITLE-ABS-KEY-AUTH(tobacco smoke pollution)) OR (TITLE-ABS-KEY-AUTH(environmental tobacco smoke pollution))) AND ((TITLE-ABS-KEY(cleft lip)) OR (TITLE-ABS-KEY-AUTH(cleft palate)) OR (TITLE-ABS-KEY-AUTH(orofacial cleft)))                                                                                                                                                                                                                                                                                                                                                                                                                                                                                                                                                                                                                                                                                                                                                 | 329        |
| TITLE-ABS-KEY(cleft lip)) OR (TITLE-ABS-KEY-AUTH(cleft palate)) OR (TITLE-ABS-KEY-AUTH(orofacial cleft))) AND ((TITLE-ABS-KEY-AUTH(passive smoking)) OR (TITLE-ABS-KEY-AUTH(tobacco smoke pollution)) OR (TITLE-ABS-KEY-AUTH(environmental tobacco smoke pollution)))                                                                                                                                                                                                                                                                                                                                                                                                                                                                                                                                                                                                                                                                                                                                                                                                                                | 37         |
| <b>Total</b>                                                                                                                                                                                                                                                                                                                                                                                                                                                                                                                                                                                                                                                                                                                                                                                                                                                                                                                                                                                                                                                                                         | <b>366</b> |
| <b>PubMed</b>                                                                                                                                                                                                                                                                                                                                                                                                                                                                                                                                                                                                                                                                                                                                                                                                                                                                                                                                                                                                                                                                                        |            |
| (("cleft lip"[MeSH Terms] OR ("cleft"[All Fields] AND "lip"[All Fields]) OR "cleft lip"[All Fields]) OR ("cleft palate"[MeSH Terms] OR ("cleft"[All Fields] AND "palate"[All Fields]) OR "cleft palate"[All Fields]) OR (orofacial[All Fields] AND cleft[All Fields])) AND (("tobacco smoke pollution"[MeSH Terms] OR ("tobacco"[All Fields] AND "smoke"[All Fields] AND "pollution"[All Fields]) OR "tobacco smoke pollution"[All Fields]) OR ("tobacco smoke pollution"[MeSH Terms] OR ("tobacco"[All Fields] AND "smoke"[All Fields] AND "pollution"[All Fields]) OR "tobacco smoke pollution"[All Fields]) OR ("environmental"[All Fields] AND "tobacco"[All Fields] AND "smoke"[All Fields] AND "pollution"[All Fields]) OR "environmental tobacco smoke pollution"[All Fields]) OR ("tobacco smoke pollution"[MeSH Terms] OR ("tobacco"[All Fields] AND "smoke"[All Fields] AND "pollution"[All Fields]) OR "tobacco smoke pollution"[All Fields]) OR ("passive"[All Fields] AND "smoking"[All Fields]) OR "passive smoking"[All Fields]) OR ("smoking"[MeSH Terms] OR "smoking"[All Fields])) | 189        |
| (("cleft lip"[MeSH Terms] OR ("cleft"[All Fields] AND "lip"[All Fields]) OR "cleft lip"[All Fields]) OR ("cleft palate"[MeSH Terms] OR ("cleft"[All Fields] AND "palate"[All Fields]) OR "cleft palate"[All Fields]) OR (orofacial[All Fields] AND cleft[All Fields])) AND (("tobacco smoke pollution"[MeSH Terms] OR ("tobacco"[All Fields] AND "smoke"[All Fields] AND "pollution"[All Fields]) OR "tobacco smoke pollution"[All Fields]) OR ("tobacco smoke pollution"[MeSH Terms] OR ("tobacco"[All Fields] AND "smoke"[All Fields] AND "pollution"[All Fields]) OR "tobacco smoke pollution"[All Fields]) OR ("environmental"[All Fields] AND                                                                                                                                                                                                                                                                                                                                                                                                                                                   | 26         |

|                                                                                                                                                                                                                                                                                                                                                                                              |             |
|----------------------------------------------------------------------------------------------------------------------------------------------------------------------------------------------------------------------------------------------------------------------------------------------------------------------------------------------------------------------------------------------|-------------|
| "tobacco"[All Fields] AND "smoke"[All Fields] AND "pollution"[All Fields]) OR "environmental tobacco smoke pollution"[All Fields]) OR ("tobacco smoke pollution"[MeSH Terms] OR ("tobacco"[All Fields] AND "smoke"[All Fields] AND "pollution"[All Fields]) OR "tobacco smoke pollution"[All Fields] OR ("passive"[All Fields] AND "smoking"[All Fields]) OR "passive smoking"[All Fields])) |             |
| <b>Total</b>                                                                                                                                                                                                                                                                                                                                                                                 | <b>215</b>  |
| <i>Google Scholar</i>                                                                                                                                                                                                                                                                                                                                                                        |             |
| (cleft lip OR cleft palate OR orofacial cleft) AND (passive smoking OR tobacco smoke pollution OR environmental tobacco smoke pollution)                                                                                                                                                                                                                                                     | 425         |
| <b>Total</b>                                                                                                                                                                                                                                                                                                                                                                                 | <b>425</b>  |
| <b>Total articles</b>                                                                                                                                                                                                                                                                                                                                                                        | <b>1006</b> |
